# Supplementary material
Source: Research Square preprint supplement (doi:10.21203/rs.3.rs-9640060/v1)
Supplement: Supplementary file 1 [file 0f5a129a34ab78ca1c7350fc.docx]

# Supplementary materials

# Categorisation of included studies

Although this study follows a systematic review protocol focused on prospective life cycle assessment (pLCA), there are methodological contribution such as the works *of Huijbregts (1998a,b)* and Huijbregts (2003) serve as key methodological contributions to both life cycle assessment (LCA) and pLCA and underpin the subsequent literature; hence, their methodology, which also covers the categorisation used in this study, is briefly introduced, however, outside the core results of the literature review.

*Huijbregts (1998b)* is one of the earliest works addressing uncertainty due to choices and parameter uncertainty. The approach used to address the parameter uncertainty in inventory data is the matrix method developed by Heijungs (1994, 1996). They demonstrate their methodology on the example of two different roof gutters by estimating the environmental impacts associated with them. To address inventory uncertainty, they propose a probabilistic approach, scenario analysis, accompanied by uncertainty importance analysis (for each system separately). The purpose of the uncertainty importance analysis is to estimate the rank correlation coefficient between each parameter's uncertainty and the model's result. *Huijbregts (1998b)* assumes a triangular distribution with uncertainty factors (UFs) to calculate the minimum and maximum values for each parameter based on its most likely value and its corresponding UF. In this work, the choice of distribution type is for simplicity, not based on measurements. The output uncertainty is further calculated using a Latin Hypercube simulation with 10,000 iterations. To rank the importance of the uncertainty, Huijbregts (1998a, 1998b) applied rank correlation coefficients, a sensitivity analysis method; high correlation coefficients for a parameter indicate a greater contribution to the uncertainty of model output.

In the subsequent work, Huijbregts et al. (2003) focus on quantifying parameter, scenario, and model uncertainty by employing Monte Carlo simulation to propagate input uncertainty and obtain an uncertainty distribution for the output. They further examine their approach on the case study of two insulation options for a standard one-family dwelling in the Netherlands.

As explained by Huijbregts et al. (2003) Monte Carlo simulation requires that each uncertain input be represented by an uncertainty distribution, which is unrealistic in LCA, given the number of parameters (e.g., over 10,000). To tackle this problem Huijbregts et al. (2003) developed a stratified approach, starting with assigning a broad uncertainty distribution to all input parameters and implementing global sensitivity analysis (e.g., Monte Carlo + Spearman rank) to determine which parameters contribute the most to the output uncertainty. Huijbregts et al. (2003) suggest highlighting the identified uncertain parameters in detail and validating their importance by running another set of sensitivity analysis; this helps with refinement. In the final step, a Monte Carlo simulation should be performed to quantify the output's uncertainty.

As defined by Huijbregts et al. (2003) scenario uncertainty arises from*“normative choices”*which are aninherent part of an LCA. Some of the key normative choices are the choices concerning multifunctionality and how to consider future conditions (inventory analysis), and choices of environmental endpoint, time horizon and spatial scope of impact (impact assessment) (Huijbregts et al., 2003; Pesonen et al., 2000). To quantify this uncertainty Huijbregts et al. (2003) suggest a two-step approach; first, a list of normative choices should be created and second, the quantification of the consequences of these choices by employing “a nonparametric bootstrapping procedure”. This is done by defining two or more alternatives for each crucial scenario (contributing the most to the uncertainty) and assigning a probability to them (decision-maker’s preference). The sum of the probability of each set should be equal to 1. In this case study, equal probability was assigned to all alternatives for each normative choice to highlight the consequences of ignoring or reducing scenario uncertainty. During bootstrapping, one alternative from each choice is randomly selected according to the assigned probability. The distribution obtained reflects the decision-maker’s uncertainty about normative decisions.

Similar to scenario uncertainty, *model uncertainty* arises from assumptions, forecasting, and model reduction that do not reflect the real world. (Guinée et al., 2001; Huijbregts et al., 2003; Huijbregts, 1998a) some of the key examples of model uncertainty are loss of spatial and temporal resolution through the aggregation of emissions in the inventory, a linear approach to economic and ecological processes (Guinée et al., 2001; Huijbregts, 1998a, 1998b) ignoring site-specific sensitivity in characterisation factors (Huijbregts, 1998b) (Further examples presented in the paper of Huijbregts et al. (2003), table 1). To quantify model uncertainty, Huijbregts et al. (2003) propose the same approach as for scenario uncertainty, creating a list of assumptions and using the same bootstrapping approach. The applicability of these studies is transferable from LCA to pLCA. The matrix-based Monte Carlo approach and bootstrapping of alternative modelling choices are later integrated into pLCA, which will be discussed in detail in this paper. The synthesis of our literature review is presented in **Table S. 1**. For each study, the table indicates (ⅰ) the primary uncertainty nature (epistemic, ontic), (ⅱ) uncertainty location (quantity, context, model), (ⅲ) the method category according to the categorisation presented in **Table 2** (e.g. quantitative, qualitative, etc.) (ⅳ) the specific method they used (ⅴ) the level of uncertainty as presented in **Table 1**, and (ⅵ) the main contribution of the paper with respect to uncertainty, presenting their key focus.

**Table S. 1** Classification of synthesised uncertainty assessment methodologies in PLCA based on nature, location, methods and level. MC: Monte Carlo Simulation; IAM: Integrated Assessment Model; LCI: Life Cycle Inventory; SA: Sensitivity analysis; GSA: Global sensitivity analysis; CLD: Casual Loop Diagram; ML: Machine learning; UA: Uncertainty assessment

| **Reference** | **Nature** | **Location** | **Method Category** | **Method** | **Level** | **Contribution** |
| --- | --- | --- | --- | --- | --- | --- |
| Pesonen et al. (2000) | **Epistemic** | Model | 3.c | What_if scenario | Medium-Deep | Early categorisation of scenario analysis approaches and their application in pLCA |
| Context | Cornerstone scenario |
| Huijbregts et al. (2003) | **Epistemic** | Quantity | 1.a + 4.b | MC (sampling) + Spearman rank on MC | Shallow-Medium | Quantification of scenario and model uncertainty types |
| Context | 1. a | Discrete scenario+bootstrap | Medium-Deep |
| Model | 1.a | Alternative model + bootstrap | Medium-Deep |
| Spielmann et al. (2005) | **Epistemic** | Model | 3.c + 4.d | Formative scenario+ Consistency Analysis | Deep | Structured scenario-based approach to deep epistemic and context uncertainty |
| Context |
| Wender et al. (2011) | **Epistemic** | Quantity (operational performance scale-up) | 3.c | Optimistic and conservative scenario analysis | Deep | Early contribution to the uncertainty assessment of Low-TRL technologies |
| Caduff et al. (2014) | **Epistemic** | Quantity (scale-up; mass/energy-performance relation) | 3.b | Power-law scaling relationships | medium | Early empirical scaling approach that derives quantitative size-based factors for inventory properties and selected impacts, enabling extrapolation in pLCA when only limited data are available |
| Piccinno et al. (2016) | **Epistemic** | Quantity (operational performance+scale-up) | 3.b | Structured engineering scale-up framework | Medium-Deep | Early systematic approach to foreground scale-up from lab to industrial scale |
| Context | 3.c | Scenario analysis | Medium |
| Mendoza Beltran et al. (2018) | **Epistemic** | Context | 3.c | Integration of IAM into Background LCI | Medium-Deep | Early systematic approach that provides a temporally consistent background by integrating IAM-based, socio-economic cornerstone scenarios and modifying the ecoinvent database accordingly |
| Quantity | 3.c | Integration of IAM into Background LCI | Medium-Deep |
| Ravikumar et al. (2018) | **Epistemic** | Quantity (operational performance+scale-up) | 1.a + 4.a | MC (sampling) +SMAA+Moment independent GSA | Shallow-Medium | Novel GSA approach that allows the ranking of emerging technologies |
| Context | 1.a+4.a | MC (sampling) +SMAA+Moment independent GSA | Medium_Deep |
| Bergerson et al. (2020) | **Epistemic** | Quantity (Foreground performance+scale-up) | 1. a, 4.a/4.b,3.b | Probabilistic, SA, Ranges, Expert Judgement | Shallow-Medium | A system-level uncertainty framework that connects technology and market uncertainty to dominant uncertainty types and handling methods |
| Context | 3.c, 3b. | Scenario analysis, | Medium-Deep |
| Model | 3.c, 3.b | Scenario analysis | Medium-Deep |
| Pizzol et al. (2021) | **Epistemic** | Quantity (LCI) | 1a+4b/4c | Database-scale perturbation | Shallow-Medium | A systematic way to identify non-linearity is a structural model issue |
| Context | 3.c | Scenario analysis | Medium |
| Model | 3.c | Scenario analysis | Medium |
| Jouannais and Pizzol (2022) | **Epistemic** (aleatory representation in the sampling) | Quantity (LCI) | 1.a + 4.a | Sobol/MC sampling+ Sobol GSA (SALib) | Medium-Deep | A stochastic parameterized ex-ante LCA framework which investigate uncertainty in unknown technology variants, operating performance, and future production routs in comibination with SA to rank the main drivers |
| Context | 1.a+4.a | Sobol/MC sampling+ Sobol GSA | Medium-Deep |
| Huppes and Schaubroeck (2022) | **Epistemic** | Context | 3.b +3.c | Predictive-validity checklist | Deep-Recognized Ignorance | Qualitative predictive-validity checklist and 9-type model typology showing that structural and scenario-level uncertainties remain even when quantitative UA/SA is performed. |
| Model | 3b + 3.c | Predictive-validity checklist | Deep-Recognized Ignorance |
| Langkau et al. (2023) | **Epistemic** | Context | 3.b +3.c+4.b | Qualitative schemes (PESTEL, CLD, expert) + Scenario analysis (cornerstone scenarios)+SA | Medium-Deep | Stepwise framework (SIMPL) that uses scientific standards of the foresight and scenario community to systematically address context uncertainty in prospective inventory modelling |
| Model | 3.b +3.c+4.b | Qualitative schemes (PESTEL, CLD, expert) + Scenario analysis (cornerstone scenarios)+SA | Medium-Deep |
| Blanco et al. (2024) | **Epistemic** | Quantity | 5. | ML surrogates + Probabilistic UA | Shallow-Deep | Integration of a Machine Learning algorithm in uncertainty assessment by using a surrogate modelling approach |
| Context | 5. | ML-enabled GSA and Deep GSA | Medium-Deep |
| Model | 5. | ML-assisted scenario discovery | Medium-Deep |
| Jouannais et al. (2024) | **Epistemic (aleatory representation in the sampling)** | Quantity (LCI) | 1.a+4.a | Sobol/MC sampling+Sobol GSA (SALib) | Medium-Deep | Parametrised, stochastic ex-ante model; heavy sampling with GSA to identify dominant influences. |
| Context | 1.a+4.a | Sobol/MC sampling+Sobol SA (SALib) | Medium-Deep | Parametrised, stochastic ex-ante model; heavy sampling with GSA to identify dominant influences. Allows for simultaneous identification of interacting uncertainties. |
| Blanco et al. (2025) | **Epistemic** | Quantity | 1.a + 4.a | Probabilistic UA (Monte Carlo) + GSA | Shallow-Deep | Framework for SSbD-oriented prospective assessment that parameterises broad uncertainty, propagates it probabilistically, ranks influential factors with GSA, and derives “sensitive scenarios” and improvement roadmaps |
| Context | 3.c + 4.a | Sensitive-scenario selection + GSA | Medium-Deep |
| Model | 3.b + 4.a | Model/scenario parameterisation + GSA | Medium-Deep |

The level of uncertainty mainly targeted is medium to deep uncertainty, which also corresponds to the patterns seen in the location of uncertainty

# Investigating the relationship between TRL, uncertainty location, and method

To investigate the possible association between TRL group and the occurrence of the different uncertainty methods and location a statistical analysis was conducted in accordance with Agresti (2007) starting with creating contingency tables. A contingency table is a table cross-classifying categorical variables, with rows and columns, it is called andtable, which is a table of counts for the possible combinations of outcomes of categorical variables (Agresti, 2007, p.22). In this review, each variable was presented by a table, with five TRL categories (Low, Mid, High, Transitional, and TRL-independent) in the rows and binary variable status (Yes=1, No=0) in the columns. The cells represent the count of studies falling into each combination of TRL group and method used, and TRL group and uncertainty location addressed. Agresti (2007) explains that when the rows are an explanatory variable and the columns are a response variable, it is feasible to divide the cells by the total summation to obtain the conditional distribution of the response (Agresti, 2007, p.22,25).

The use of normal correlation methodologies do not work in this case. The property used to find the suitable association method is called the expected cell count. In all seven contingency tables, at least one expected cell count fell below 5, which is the threshold for using the chi-square test (Agresti, 2007, p. 40; Madadizadeh et al., 2026). Hence, Fisher-Freeman-Halton exact test was chosen (Freeman & Halton, 1951), which estimates the probability of every possible table that could have been produced with the same structure of row and column and the observed data. This is a very computationally intensive task for the number of studies (sample size = 95 studies). This problem is solved by using Monte Carlo simulation and creating random tables, that have the total values and uses these to estimate the exact p-value (The probability of receiving the same results or more extreme results under the assumption that the null hypothesis is correct (Thiese et al., 2016)).

The statistical analysis was conducted in R software using fisher.test() form R’s base stats package (R Core Team, 2024), with simulate.p.value = TRUE and B = 100,000 (R’s default B=2,000) random runs (replicants). Larger numbers of B is assigned for stable estimation (Madadizadeh et al., 2026).

Fisher’s test gives an answer to the question if there is an association or not but it cannot tell how strong the association is. To measure the strength, Cramérs V is calculated, which estimates the strength on a scale from 0 (no association) to 1 (perfect association), independent of the sample size (McHugh, 2013).

To avoid false positives due to multiple comparisons problems Holm-Bonferroni method was applied to adjust the p-value (Holm, 1979; Abdi, 2010). This method was implemented in R by using p.adjust(method=”holm”) (R Core Team, 2024).

To identify which specific TRL is behind the association and which TRL category is behaving differently from the others, the adjusted standardised residual (ASR) for each cell (Haberman,1973) by showing the gap between the observed count and the expected count, which is expressed as standard deviation assuming a normal distribution. Values deviating from shows a significant deviation at (Agresti, 2007, p.38). In R this method was implemented using the **stdres** component **stats::chisq.test()** in R (R Core Team, 2024) due to the fact that ASRs are not produced by **fisher.test().** The R analysis script used for statistical analysis was developed with the assistance of Claude (Anthropic, 2026), a large language model. All analytical decisions, interpretations, and conclusions are the responsibility of the authors.

# Analysis of the collected records

Since this study was focused, a limited number of studies were included in the list, and to examine the patterns observed for the included studies, these were compared with the collected studies. Co-occurrence of the methods and locations of all the collected records are presented in Fig. S1. The complete results and analysis are available in the supplementary Excel files.

#
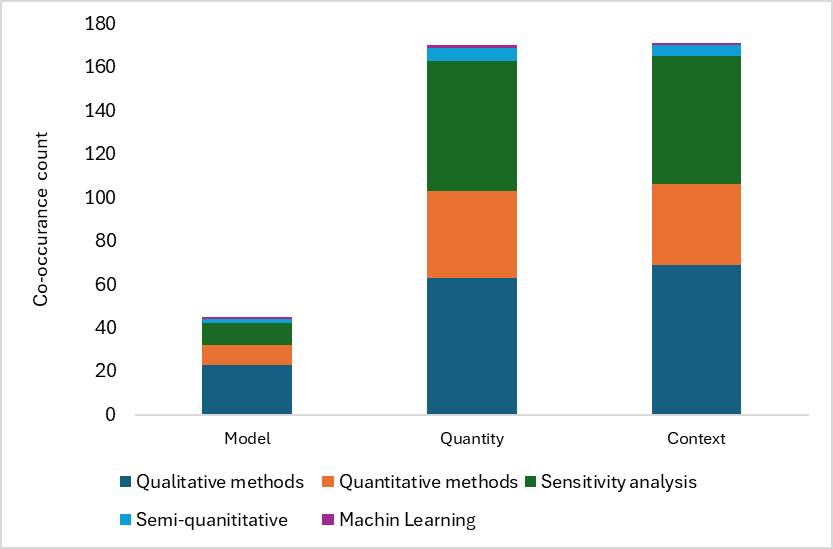


**Fig. S 1** Stacked bar presenting the co-occurrence of the uncertainty method and the location of full-text reviewed studies

# References

- Abdi, H. (2010). Holm’s sequential Bonferroni procedure. *Encyclopedia of research design*, *1*(8), 1-8.
- Agresti, A. (2007). An introduction to categorial data analysis (2nd ed.). Hoboken, NJ: John Wiley & Sons
- Anthropic. (2026). Claude 4.6 Sonnet [Large language model]. https://claude.ai.
- Bergerson JA, Brandt A, Cresko J, Carbajales-Dale M, MacLean HL, Matthews HS, McCoy S, McManus M, Miller SA, Morrow WR, Posen ID, Seager T, Skone T, Sleep S (2020) Life cycle assessment of emerging technologies: Evaluation techniques at different stages of market and technical maturity. J Ind Ecol 24:11–15. <https://doi.org/10.1111/jiec.12954>.
- Blanco CF, Pauliks N, Donati F, Engberg N, Weber J (2024) Machine learning to support prospective life cycle assessment of emerging chemical technologies. Curr Opin Green Sustain Chem 50:100979. <https://doi.org/10.1016/j.cogsc.2024.100979>.
- Blanco, C. F., Behrens, P., Vijver, M., Peijnenburg, W., Quik, J., & Cucurachi, S. (2025). A framework for guiding safe and sustainable-by-design innovation. J. Ind. Ecol., 29, 47–65. https://doi.org/10.1111/jiec.13609
- Freeman GH, Halton JH (1951) Note on an exact treatment of contingency, goodness of fit and other problems of significance. Biometrika 38:141–149
- Guinée JB, Huppes G, Heijungs R (2001) Developing an LCA guide for decision support. Environ Manag Health 12:301–311. https://doi.org/10.1108/09566160110388147
- Haberman, SJ 1973, ‘The Analysis of Residuals in Cross-Classified Tables’, Biometrics, vol. 29, no. 1. <https://doi.org/10.2307/2529686>
- Holm, S. (1979). A Simple Sequentially Rejective Multiple Test Procedure. Scand. J. Stat., 6(2), 65–70. http://www.jstor.org/stable/4615733
- Huijbregts MA, Gilijamse W, Ragas AMJ, Reijnders L (2003) Evaluating uncertainty in environmental life-cycle assessment: A case study comparing two insulation options for a Dutch one-family dwelling. Environ Sci Technol 37:2600–2608. https://doi.org/10.1021/es020971
- Huijbregts MAJ (1998a) Application of uncertainty and variability in LCA. Int J Life Cycle Assess 3:273–280. https://doi.org/10.1007/BF02979835.
- Huijbregts MAJ (1998b) Dealing with parameter uncertainty and uncertainty due to choices in life cycle assessments. Int J Life Cycle Assess 3:289–297. <https://doi.org/10.1007/BF02979345>
- Huppes G, Schaubroeck T (2022) Forecasting the future sustainability of technology choices: Qualitative predictive validity of models as a complement to quantitative uncertainty. Front Sustain 3:14. <https://doi.org/10.3389/frsus.2022.629653>
- Jouannais P, Blanco CF, Pizzol M (2024) Environmental success under uncertainty and risk (ENSURe): A procedure for probability evaluation in ex-ante LCA. Technol Forecast Soc Change 201:123265. <https://doi.org/10.1016/j.techfore.2024.123265>
- Jouannais P, Pizzol M (2022) Stochastic ex-ante LCA under multidimensional uncertainty: Anticipating the production of undiscovered microalgal compounds in Europe. Environ Sci Technol 56:16382–16393. <https://doi.org/10.1021/acs.est.2c04849>
- Langkau S, Steubing B, Mutel C, Ajie MP, Erdmann L, Voglhuber-Slavinsky A, Janssen M (2023) A stepwise approach for scenario-based inventory modelling for prospective LCA (SIMPL). Int J Life Cycle Assess 28:1169–1193. <https://doi.org/10.1007/s11367-023-02175-9>
- Madadizadeh, F., Soodejani, M. T., & Bahariniya, S. (2026). An Educational Tutorial on Fisher's Exact Test for Medical Researchers. J. Reliab. Stat. Stud., 19(1), 199–214.<https://doi.org/10.13052/jrss0974-8024.1919>
- McHugh, M. L. (2013). The Chi-square test of independence. Biochem. Med, 23(2), 143-149. <https://doi.org/10.11613/BM.2013.018>
- Mendoza Beltran A, Cox B, Mutel C, van Vuuren DP, Font Vivanco D, Deetman S, Edelenbosch OY, Guinée J, Tukker A (2018) When the background matters: Using scenarios from integrated assessment models in prospective life cycle assessment. J Ind Ecol 24:64–79. <https://doi.org/10.1111/jiec.12825>
- Pesonen H-L, Ekvall T, Fleischer G, Huppes G, Jahn C, Klos ZS, Rebitzer G, Sonnemann GW, Tintinelli A, Weidema BP (2000) Framework for scenario development in LCA. Int J Life Cycle Assess 5:21–30. <https://doi.org/10.1007/BF02978555>
- Piccinno F, Hischier R, Seeger S, Som C (2016) From laboratory to industrial scale: A scale-up framework for chemical processes in life cycle assessment studies. J Clean Prod 135:1085–1097. <https://doi.org/10.1016/j.jclepro.2016.06.164>
- Pizzol M, Sacchi R, Köhler S, Erjavec AA (2021) Non-linearity in the life cycle assessment of scalable and emerging technologies. Front Sustain 1:16. <https://doi.org/10.3389/frsus.2020.611593>
- Ravikumar D, Seager TP, Cucurachi S, Prado V, Mutel C (2018) Novel method of sensitivity analysis improves the prioritization of research in anticipatory life cycle assessment of emerging technologies. Environ Sci Technol 52:6534–6543. <https://doi.org/10.1021/acs.est.7b04517>
- Spielmann M, Scholz RW, Tietje O, de Haan P (2005) Scenario modelling in prospective LCA of transport systems: Application of formative scenario analysis. Int J Life Cycle Assess 10:325–335. <https://doi.org/10.1065/lca2004.10.188>
- Thiese, M. S., Ronna, B., & Ott, U. (2016). P value interpretations and considerations. J Thorac Dis, 8(9), E928–E931. https://doi.org/10.21037/jtd.2016.08.16
- Wender BA, Seager TP (2011) Towards prospective life cycle assessment: Single-wall carbon nanotubes for lithium-ion batteries. In: Proceedings of the IEEE International Symposium on Sustainable Systems and Technology (ISSST). <https://doi.org/10.1109/ISSST.2011.5936889>
